1 **MicroRNAs contribute to the host response to *Coxiella burnetii***

2 Madhur Sachan<sup>1,2</sup>, Katelynn R. Brann<sup>3</sup>, Daniel E. Voth<sup>3</sup>, Rahul Raghavan<sup>1,4\*</sup>

3

4 <sup>1</sup>Department of Biology, Portland State University, Portland, OR, 97201, USA.

5 <sup>2</sup>Department of Medicine, Cardiovascular Division, Brigham and Women's Hospital,

6 Harvard Medical School, Boston, MA, USA 02115.

7 <sup>3</sup>Department of Microbiology and Immunology, University of Arkansas for Medical Sciences,

8 Little Rock, AR, 72205, USA.

9 <sup>4</sup>Department of Molecular Microbiology and Immunology, The University of Texas at San

10 Antonio, San Antonio, TX, 78249, USA.

11

12 \*Author for correspondence:

13 Rahul Raghavan | Email: [rahul.raghavan@utsa.edu](mailto:rahul.raghavan@utsa.edu)

14

15 **Key words:** *Coxiella burnetii*, miRNA, macrophage, apoptosis, autophagy, infection

16

17

18

19

20

21 **ABSTRACT**

22 MicroRNAs (miRNAs), a class of small non-coding RNAs, are critical to gene regulation in  
23 eukaryotes. They are involved in modulating a variety of physiological processes, including the  
24 host response to intracellular infections. Little is known about miRNA functions during infection  
25 by *Coxiella burnetii*, the causative agent of human Q fever. This bacterial pathogen establishes a  
26 large replicative vacuole within macrophages by manipulating host processes such as apoptosis  
27 and autophagy. We investigated miRNA expression in *C. burnetii*-infected macrophages and  
28 identified several miRNAs that were down- or up-regulated during infection. We further  
29 explored the functions of miR-143-3p, an miRNA whose expression is down-regulated in  
30 macrophages infected with *C. burnetii*, and show that increasing the abundance of this miRNA in  
31 human cells results in increased apoptosis and reduced autophagy – conditions that are  
32 unfavorable to *C. burnetii* intracellular growth. In sum, this study demonstrates that *C. burnetii*  
33 infection elicits a robust miRNA-based host response, and because miR-143-3p promotes  
34 apoptosis and inhibits autophagy, down-regulation of miR-143-3p expression during *C. burnetii*  
35 infection likely benefits the pathogen.

36

37

## 38 INTRODUCTION

39 The highly infectious intracellular pathogen *Coxiella burnetii* is the etiological agent of Q fever  
40 (1–3). After uptake by a host cell, typically an alveolar macrophage, *C. burnetii* establishes a  
41 replicative niche termed the *Coxiella*-containing vacuole (CCV) that matures by fusing with  
42 lysosomal, autophagic, and secretory vesicles (4–6). To facilitate intracellular replication, *C.*  
43 *burnetii* secretes effector proteins into the host cytosol using a Dot/Icm Type IVB secretion  
44 system (T4SS) that disrupt several host processes, including apoptosis, lipid metabolism,  
45 inflammation, and vesicular trafficking (3, 7–12). For instance, *C. burnetii* inhibits host  
46 apoptosis by recruiting anti-apoptotic Bcl-2 to the CCV, inactivating pro-apoptotic Bad, and  
47 promoting a pro-survival response by activating Erk1/2, Akt, and PKA signaling (13–16).  
48 Similarly, autophagy-related proteins such as LC3 and p62 are recruited to CCV in a T4SS-  
49 dependent manner (10, 17), and inhibition of autophagy components results in reduced *C.*  
50 *burnetii* replication (18, 19).

51 MicroRNAs (miRNAs) are a class of single-stranded, small (~22 nucleotides), non-  
52 coding RNAs that orchestrate post-transcriptional gene regulation in eukaryotes and some  
53 viruses (20). In humans, miRNAs regulate a large number of genes, primarily by inhibiting target  
54 gene expression via translation repression and messenger RNA (mRNA) degradation (21–23).  
55 Studies have shown that miRNAs are integral to the host response to bacterial, viral, and  
56 parasitic infections (24–31); however, miRNAs could either promote or inhibit infection. For  
57 example, induction of miR-142-3p expression in macrophages leads to down-regulation of N-  
58 Wasp, an actin-binding protein, resulting in reduced uptake of *Mycobacterium tuberculosis* (32).  
59 Conversely, induction of miR-125a-3p in macrophages inhibits autophagy and phagosomal

60 maturation, which favors intracellular survival of *M. tuberculosis* by promoting autophagosomal  
61 escape (33).

62 Expression of miRNAs is perturbed in macrophages infected with *C. burnetii* (34), but  
63 their potential roles are unknown. In this study, we investigated macrophage gene expression  
64 across five time-points during *C. burnetii* infection and identified a large number of miRNAs and  
65 protein-coding genes that were differentially expressed, suggesting their involvement in the host  
66 response to infection. We also demonstrate that transfecting host cells with miR-143-3p results in  
67 reduced *C. burnetii* growth, enhanced apoptosis and diminished autophagy. Collectively, our  
68 data indicate that an intracellular environment with a low level of miR-143-3p is conducive to *C.*  
69 *burnetii* growth.

70

## 71 **RESULTS**

### 72 **Host gene expression correlates with bacterial growth**

73 To identify infection-associated miRNAs and their potential mRNA targets, we measured  
74 miRNA and protein-coding gene expression in THP-1 macrophages infected with *C. burnetii*  
75 Nine Mile RSA439 Phase II (NMII). The total number of differentially expressed ( $\log_2$  fold-  
76 change  $\geq 0.75$ ,  $P_{adj} \leq 0.05$ ) miRNAs and mRNAs increased from 25 to 60 and 454 to 6,525,  
77 respectively, from day 1 to day 3 (**Table 1 and S1**). By day 5, far fewer miRNAs and protein-  
78 coding genes ((34, 211, respectively) were up- or down-regulated in *C. burnetii*-infected cells.  
79 This pattern of gene expression suggests that the magnitude of the host cell response to *C.*  
80 *burnetii* infection increases as the bacterium actively replicates (day 3), and as LCVs transition  
81 to metabolically less active SCVs (day 5) (35), host response becomes muted in tandem.

82

83 **miRNAs potentially regulate multiple host signaling pathways during *C. burnetii* infection**

84 To identify genes and metabolic pathways targeted by miRNAs, we first performed inverse-  
85 expression pairing using the Ingenuity Pathway Analysis (IPA) tool (36). We selected miRNAs  
86 and their known or predicted target genes that showed an inverse pattern of expression in *C.*  
87 *burnetii*-infected cells. For instance, if expression of an miRNA is up-regulated in *C. burnetii*-  
88 infected cells, we chose targets that are down-regulated, and vice versa. This analysis identified  
89 14, 18, 25, 51, and 23 miRNAs at 8 h, 24 h, 48 h, 72 h, and 120 h post-infection (hpi),  
90 respectively, that were inversely paired with differentially-expressed target mRNAs (**Table S2**).  
91 We then investigated biochemical pathways that were enriched for these proteins using the Core  
92 Analysis function in IPA, which revealed 215 pathways, including apoptosis signaling,  
93 PI3K/AKT, and autophagy that are likely regulated by miRNAs (**Figure 1, Table S3**). To  
94 investigate the role of miRNAs in apoptosis, a process known to be important during *C. burnetii*  
95 infection (13, 37–40), we measured expression of 84 miRNAs associated with apoptosis using a  
96 targeted qPCR array (41). This assay showed that 12 miRNAs were up- or down-regulated in *C.*  
97 *burnetii*-infected cells at 72 hpi (**Table 2**), suggesting their involvement in apoptosis regulation  
98 as part of the host response to *C. burnetii*.

99

100 **miR-143-3p is down-regulated in *C. burnetii*-infected human alveolar macrophages**

101 Among apoptosis-related miRNAs, we focused on miR-143-3p, which was significantly down-  
102 regulated in NMII-infected THP-1 cells (**Table 2, Figure 2A**). Because NMII is an avirulent  
103 laboratory strain and THP-1 cells are not natural host cells for *C. burnetii*, we measured miR-  
104 143-3p expression using primary human alveolar macrophages (hAMs) infected with the fully  
105 virulent *C. burnetii* Nine Mile RSA493 Phase I (NMI) strain. At 72 hpi, expression of miR-143-

106 3p was significantly down-regulated in hAMs infected with *C. burnetii* (**Figure 2B**).  
107 Intriguingly, expression of miR-143-3p was significantly lower in NMI-infected than in NMII-  
108 infected hAMs. While the cause for this disparity is currently unknown, the full-length  
109 lipopolysaccharide (LPS) present in NMI might play a role because LPS is known to repress  
110 transcription of the miR-143/145 gene cluster (42).

111

### 112 **Increased miR-143-3p expression inhibits *C. burnetii* growth**

113 Because expression of miR-143-3p is down-regulated during *C. burnetii* infection, we tested how  
114 higher levels of miR-143-3p in host cells would impact intracellular growth. We first transfected  
115 HeLa cells with either miR-143-3p or a non-specific control miRNA (miR-control) and then  
116 infected cells with NMII and measured bacterial growth at 48 hpi. As shown in **Figure 3, C**,  
117 *burnetii* grew significantly better in untransfected and miR-control-transfected cells compared to  
118 miR-143-3p-transfected cells, indicating that an intracellular environment with low levels of  
119 miR-143-3p could be advantageous to the pathogen.

120

### 121 **Early apoptosis is enhanced in cells transfected with miR-143-3p**

122 To test the impact of miR-143-3p on apoptosis, we transfected HeLa cells with either miR-143-  
123 3p or miR-control and assessed early- and late-stage apoptosis using annexin V-PE and  
124 eFluor780 staining followed by flow cytometry (43). We observed that the percentage of early,  
125 but not late, apoptotic cells in the miR-143-3p-transfected population was significantly higher  
126 than in cells transfected with miR-control (**Figure 4**). To begin to understand miR-143-3p's  
127 regulatory circuit, we assessed expression of *akt1* (AKT Serine/Threonine Kinase 1) and *bcl2* (B-  
128 cell lymphoma 2), two genes targeted by miR-143-3p that are central to apoptosis regulation in

129 human macrophages (**Figure S1**) (44–47). Expression of *akt1* and *bcl2* genes and levels of  
130 activated Akt and Bcl-2 proteins were significantly reduced in miR-143-3p-expressing cells  
131 compared to cells transfected with miR-control (**Figure 5**). Together, our data suggest that lower  
132 levels of miR-143-3p present in *C. burnetii*-infected cells increases expression of *akt1* and *bcl2*,  
133 which likely stalls apoptosis induction, thereby supporting the pathogen's intracellular growth.

134

### 135 **miR-143-3p has potential roles in autophagy**

136 Analysis of miRNA-targeted pathways indicated that miRNAs could also be involved in  
137 autophagy (**Table S3**), a process that is interconnected with apoptosis and is involved in the host  
138 response to *C. burnetii* (18, 48–50). We measured rapamycin-induced autophagic flux in HeLa  
139 cells transfected with either miR-143-3p or miR-control and observed that autophagic flux was  
140 slightly, but significantly, lower in miR-143-3p-transfected cells compared to miR-control-  
141 transfected cells (**Figure 6**). Several genes involved in autophagy, including *atp6v1a* (V-type  
142 proton ATPase catalytic subunit A) and *slc7a11* (Solute Carrier Family 7 Member 11) are  
143 controlled by miR-143-3p (24, 25). We observed significantly reduced expression of *atp6v1a*  
144 and *slc7a11* and concordant reduction in their encoded proteins (VATA and xCT, respectively)  
145 in miR-143-3p-transfected cells compared to control cells (**Figure 7, Table S4**), indicating a role  
146 for these genes in reduced autophagic flux in miR-143-3p-expressing cells.

147

## 148 **DISCUSSION**

149 In this study, we show, for the first time, that *C. burnetii* infection elicits a robust miRNA-based  
150 host response, and closer examination of miR-143-3p function revealed that the miRNA  
151 promotes apoptosis and inhibits autophagy. This combination of phenotypes potentially produces

152 an intracellular environment that is not conducive to *C. burnetii* growth, likely explaining down-  
153 regulation of miR-143-3p expression during *C. burnetii* infection. miR-143-3p presumably  
154 antagonizes *C. burnetii* growth by modulating components of the PI3K-Akt signaling network,  
155 which controls diverse host cell functions (**Figure S1**) (51). Activation of Akt by P13K induces  
156 expression of pro-survival Bcl-2 and inhibits pro-apoptotic proteins such as Bad (52), leading to  
157 decreased caspase-3 activation and subsequent inhibition of intrinsic apoptosis. During *C.*  
158 *burnetii* infection, Akt is activated, Bcl-2 is recruited to CCVs, and the pathogen secretes  
159 effector proteins that inhibit apoptosis (15, 16, 39, 53). Our results add to this knowledge by  
160 demonstrating that levels of Akt and Bcl-2 are significantly reduced and early apoptosis is  
161 significantly enhanced in cells transfected with miR-143-3p. No significant difference is evident  
162 in late apoptosis, a process characterized by DNA fragmentation, suggesting that miR-143-3p  
163 does not affect this process.

164 In addition to inhibiting apoptosis, *C. burnetii* manipulates autophagy to generate CCVs  
165 (10, 18, 49, 50). Interestingly, miR-143-3p appears to inhibit autophagy, and several genes  
166 involved in this process, including *atp6v1a* and *slc7a11*, are regulated by miR-143-3p (23–25,  
167 54–57). Expression of both genes is significantly reduced in miR-143-3p-transfected cells,  
168 indicating that the miRNA's effect on autophagy involves regulation of v-ATPase and  
169 cystine/glutamate antiporter xCT. In accordance with our results, inhibition of autophagy causes  
170 improper CCV maturation and reduces intracellular *C. burnetii* growth (17, 58, 59). Inhibition of  
171 ATP6V1A, a catalytic subunit of the lysosomal v-ATPase, likely disrupts autophagic flux by  
172 inhibiting V-ATPase-dependent acidification of developing CCV, thereby reducing *C. burnetii*  
173 growth (56). Furthermore, inhibition of xCT (encoded by *slc7a11*), a cystine/glutamate antiporter  
174 that relies on autophagy machinery to import cystine, could deprive the pathogen of cysteine, an



175 amino acid essential to its growth (55, 60, 61). Finally, although this needs to be confirmed in  
176 macrophages, overexpression of miR-143-3p in human endothelial progenitor cells decreased  
177 LC3-II and increased p62 levels, two phenotypes that strongly imply a role for miR-143-3p in  
178 dampening autophagic flux (62). Cumulatively, our data suggest that down-regulation of miR-  
179 143-3p during *C. burnetii* infection promotes intracellular growth of the pathogen by delaying  
180 apoptosis and promoting autophagy. Further studies are required to determine if this is a *C.*  
181 *burnetii*-driven process and if LPS and/or T4SS effectors promote pathogen growth by down-  
182 regulating miR-143-3p expression.

183

## 184 **MATERIALS AND METHODS**

### 185 **Bacterial strains and growth conditions**

186 *Coxiella burnetii* Nine Mile RSA439 (Phase II, Clone 4) isolate (NMII) was cultured in acidified  
187 citrate cysteine medium-2 (ACCM-2) for 7 days at 37°C, 5% CO<sub>2</sub>, 2.5% O<sub>2</sub> (63). Bacteria were  
188 quantified using PicoGreen (64, 65), collected by centrifugation (3000 x g, 10 min, 4°C),  
189 resuspended in PBS containing 0.25 M sucrose (PBSS), and stored at -80°C until further use.  
190 Before infection, THP-1 cells (American Type Culture Collection, TIB-202) were differentiated  
191 into adherent, macrophage-like cells in RPMI-1640 supplemented with 1 mM sodium pyruvate,  
192 0.05 mM beta-mercaptoethanol, 4500 mg/L glucose, and 10% heat-inactivated fetal bovine  
193 serum (FBS) at 37°C under 5% CO<sub>2</sub> for 24 h using 30 nM phorbol 12-myristate 13-acetate  
194 (PMA), followed by 24 h of rest in PMA-free medium. Cells were infected with NMII at a  
195 multiplicity of infection (MOI) of 25 in serum-free growth medium for two hours and this time-  
196 point was considered to be 0 hpi. To remove extracellular bacteria, cells were washed three  
197 times with PBS followed by replacement with complete growth medium, which was replaced

198 with fresh medium at 72 hpi. Primary human alveolar macrophages (hAMs) were harvested by  
199 bronchoalveolar lavage (BAL) from postmortem human lung donors and infected with either  
200 NMI (*C. burnetii* Nine Mile Phase I RSA493) or NMII at 25 MOI. hAMs were cultured at 37°C  
201 under 5% CO<sub>2</sub> in Dulbecco's modified Eagle/F-12 (DMEM/F12) medium (Gibco) containing  
202 10% FBS for 72 hpi, as described previously (66).

203

#### 204 **Transfection of HeLa cells**

205 miRCURY LNA hsa-miR-143-3p and miRNA negative control were purchased from Qiagen.  
206 The negative control (miR-control) is a non-specific miRNA that shows no homology to any  
207 known miRNA or mRNA sequences annotated in mouse, rat, or human genomes. HeLa cells  
208 were reverse transfected with miRNAs as previously described (67). Briefly, 25 nM (final  
209 concentration) of either miR-143-3p mimic or miR-control was incubated in HiPerFect  
210 Transfection Reagent (Qiagen) for 10 min at room temperature to allow formation of transfection  
211 complexes. Transfection complexes were uniformly spotted at the bottom of each well of a 24-  
212 well tissue culture plate and  $3.5 \times 10^4$  HeLa cells were added to each well and incubated in  
213 OptiMEM medium. After 24 h, the medium was removed, and cells were washed twice with  
214 PBS before infection with NMII at an MOI of 100 in serum-free DMEM medium for two hours  
215 followed by washing and replenishing cells with serum-containing DMEM medium for  
216 experiments at 48 hpi.

217

#### 218 **Intracellular growth assay**

219 *C. burnetii* growth was measured at 48 hpi in HeLa cells transfected 24 h prior to infection with  
220 either miR-143-3p or miR-control. To quantify intracellular bacteria using qPCR, total DNA was

221 extracted using QIAamp DNA Mini Kit (Qiagen) according to the manufacturer's instructions  
222 and SYBR Green-based qPCR was performed using *C. burnetii*-specific primers (**Table S5**), as  
223 described previously (65). Quantification cycle (Cq) values were converted to bacterial genome  
224 equivalents (GE) using a standard curve, as described previously (64). Since qPCR-based  
225 quantitation does not differentiate between live and dead cells, we independently quantified  
226 viable intracellular bacteria by enumerating colony forming units (CFUs), as described  
227 previously (68, 69). Briefly, infected host cells were lysed in ice-cold water for 40 min at 4°C  
228 followed by repeated pipetting with a syringe and 25G needle to lyse remaining cells,  
229 centrifuged for 10 min at 70 x g (4°C) followed by centrifugation of supernatants for 1 min at  
230 13,500 x g (4°C). Pellets were resuspended in ACCM-2, serially diluted, and spot-plated on  
231 ACCM-2 containing 0.5 mM tryptophan and 0.5% agarose. Plates were incubated for 10 days at  
232 37°C, 5% CO<sub>2</sub>, and 2.5% O<sub>2</sub> before enumerating CFUs.

233

#### 234 **RNA sequencing, miRNA-target interactions and pathway analysis**

235 THP-1 macrophages infected with NMII (MOI of 25) and uninfected controls were analyzed at  
236 8, 24, 48, 72, and 120 hpi for miRNA and mRNA expression. At each time point, growth  
237 medium was replaced with 1 ml of TRI reagent (Life Technologies) and total RNA was extracted  
238 and treated with DNase (Invitrogen) per the manufacturer's instructions. Samples were  
239 sequenced using Illumina NovaSeq 6000 for mRNAs and Illumina HiSeq 2500 for miRNAs at  
240 the Yale Center for Genome Analysis or Novogene Corporation, Sacramento, CA. Sequencing  
241 reads were mapped to the reference human miRNA (miRbase 22.1) or genome (GRCh38)  
242 databases using CLC Genomics Workbench v6.5 (Qiagen) (70, 71). Differential gene expression  
243 ( $\log_2$  fold-change  $\geq 0.75$ ; adjusted p-value  $\leq 0.05$ , Wald test) between NMII-infected and

244 uninfected cells was calculated using DESeq2 (72). Inverse-expression pairings of differentially-  
245 expressed miRNAs and mRNAs and IPA core analysis of differentially-expressed genes were  
246 performed using Ingenuity Pathway Analysis (IPA, Qiagen) (36).

247

### 248 **Quantitative Reverse Transcription PCR (qRT-PCR)**

249 Expression of 84 apoptosis-related miRNAs was measured using a miScript miRNA PCR Array  
250 Human Apoptosis kit (Qiagen). Briefly, total RNA extracted from infected or uninfected  
251 macrophages at 72 h pi (n = 3) were reverse transcribed using a miScript II RT kit and HiSpec  
252 buffer (Qiagen) and qPCR reactions were performed on a Stratagene Mx3005P Real-Time PCR  
253 system. miRNA expression data were normalized using the global quantitation cycle (Cq) mean  
254 of expressed miRNAs, and relative miRNA expression levels were calculated using the delta-  
255 delta Cq method (73). Expression of *akt1*, *bcl2*, *atp6v1a*, and *slc7a11* was quantified using qRT-  
256 PCR using *gapdh* primers as an endogenous reference control, as described previously (65).  
257 Briefly, total RNA was extracted, DNase-treated, and cDNA generated using RevertAid First  
258 Strand cDNA Synthesis Kit (Thermo Scientific). To perform qPCR, cDNA templates were  
259 diluted and mixed with gene-specific primers and SYBR Green (Applied Biosystems) in a 20  $\mu$ l  
260 reaction according to the recommended protocol (Applied Biosystems). Primers used in this  
261 study are listed in **Table S5**. To assay miR-143-3p expression in hAMs, PCR primers for miR-  
262 143-3p and the endogenous reference *rnuc6* (small nuclear ribonucleic acid) were procured from  
263 Qiagen and qRT-PCR reactions were performed as described above.

264

265

266

267 **Apoptosis assay**

268 Apoptosis was quantified in HeLa cells transfected with miR-143-3p or miR-control using  
269 Annexin V-PE (Invitrogen) and Fixable Viability Dye eFluor780™ (Invitrogen) (43). At 72 h  
270 post-transfection, cells were treated with trypsin, stained with eFluor780 Fixable Viability Dye  
271 for 30 min in dark (4°C), followed by staining with Annexin V-PE for 15 min per the  
272 recommended protocol (Invitrogen). Cells were immediately assayed for early apoptosis  
273 (Annexin V-PE positive and eFluor780 negative) and late apoptosis/necrosis (Annexin V-PE  
274 positive and eFluor780 positive) markers using a FACSAria Fusion flow cytometer (BD  
275 Biosciences). Fluorescence parameters were gated using unstained and single-stained cells and a  
276 total of 10,000 events were counted for each sample using FACSDiva Software (BD  
277 Biosciences).

278

279 **Autophagic flux assay**

280 CYTO-ID Autophagy Detection Kit 2.0 (ENZ-KIT175, Enzo Life Sciences) was used to  
281 quantify autophagic flux at 72 h post transfection on HeLa cells transfected with either miR-143-  
282 3p or miR-control. Cells were treated with media containing 200 nM rapamycin for 16 h to  
283 induce detectable levels of autophagy (74, 75), washed, and incubated for 30 min at 37°C in  
284 Microscopy Dual Detection Reagent containing CYTO-ID green detection reagent and Hoechst  
285 33342 nuclear stain in 1X assay buffer. Three sets of at least 200 cells per well were immediately  
286 analyzed using a fluorescence microscope (Keyence Corporation) and levels of autophagic flux  
287 were measured as average CYTO-ID green brightness per cell calculated using Keyence BZ-  
288 X700 software (76, 77).

289

290 **Multiplex immunoassay**

291 Activation (phosphorylation) of proteins involved in early apoptosis, including Akt (pS473) and  
292 Bcl-2 (Ser70), were quantified using 7-Plex Early Apoptosis Magnetic Bead Kit (EMD  
293 Millipore). Total cell lysate from HeLa cells transfected with miR-143-3p or miR-control was  
294 prepared using Lysis Buffer containing protease inhibitors, followed by bicinchoninic acid  
295 (BCA) quantitation at 72 h post-transfection. Briefly, 17.5 µg/well of diluted cell lysate was  
296 added to 1X magnetic beads at 1:1 ratio in a 96-well plate. The plate was incubated on a plate  
297 shaker (4°C, 700 rpm, dark) for 18 h, followed by washing and incubation with 1X Detection  
298 Antibody for 60 min at room temperature (RT) with shaking (700 rpm, dark). The detection  
299 antibody was then removed, and samples were incubated for 15 min at RT in the dark with 1X  
300 Streptavidin-PE (SAPE) followed by 15 min incubation (RT, dark) with the amplification buffer.  
301 SAPE and amplification buffer were removed, and beads were resuspended in 150 µl of assay  
302 buffer to analyze median fluorescence intensity (MFI) using a Luminex 200 system.

303

304 **Quantitative mass spectrometry**

305 Total cell lysate from HeLa cells transfected with either miR-143-3p or miR-control were  
306 collected at 48h post-transfection in triplicates. TMT labeling and mass spectrometry were  
307 performed at the Proteomics Shared Resource facility at Oregon Health & Science University, as  
308 described previously (78). Briefly, samples were lysed, sonicated, and heated at 90°C for 10 min  
309 followed by overnight micro-digestion of each sample using an S-trap micro protocol. Peptides  
310 were labelled with TMT6-plex reagents, and multiplexed TMT-labeled samples were separated  
311 by two-dimensional reversed-phase-reversed-phase (2DRPRP) liquid chromatography on a  
312 Orbitrap Fusion Tribrid instrument (Thermo Scientific). Proteins were identified by searching

313 against the human proteome in UniProt, and TMT reporter ion intensities were processed with  
314 in-house scripts. Differential protein abundance was determined by the Bioconductor package  
315 edgeR.

316

### 317 **Data availability**

318 Sequencing reads from this study have been deposited on NCBI Sequence Read Archive (SRA)  
319 under the BioProject accession PRJNA679931.

320

### 321 **ACKNOWLEDGEMENTS**

322 This work was supported in part by National Institutes of Health grants AI123464 and AI133023  
323 to R.R.

324

### 325 **REFERENCES**

- 326 1. Gürtler L, Bauerfeind U, Blümel J, Burger R, Drosten C, Gröner A, Heiden M, Hildebrandt  
327 M, Jansen B, Offergeld R, Pauli G, Seitz R, Schlenkrich U, Schottstedt V, Strobel J,  
328 Willkommen H. 2014. *Coxiella burnetii* - Pathogenic Agent of Q (Query) Fever. *Transfus Med*  
329 *Hemother* 41:60–72.
- 330 2. Minnick MF, Raghavan R. 2012. Developmental biology of *Coxiella burnetii*. *Adv Exp Med*  
331 *Biol* 984:231–248.
- 332 3. van Schaik EJ, Chen C, Mertens K, Weber MM, Samuel JE. 2013. Molecular pathogenesis of  
333 the obligate intracellular bacterium *Coxiella burnetii*. *Nat Rev Microbiol* 11:561–573.
- 334 4. Dragan AL, Voth DE. 2020. *Coxiella burnetii*: international pathogen of mystery. *Microbes*  
335 *Infect* 22:100–110.

- 336 5. Larson CL, Martinez E, Beare PA, Jeffrey B, Heinzen RA, Bonazzi M. 2016. Right on Q:  
337 genetics begin to unravel *Coxiella burnetii* host cell interactions. *Future Microbiol* 11:919–939.
- 338 6. Newton P, Thomas DR, Reed SCO, Lau N, Xu B, Ong SY, Pasricha S, Madhamshettiwar PB,  
339 Edgington-Mitchell LE, Simpson KJ, Roy CR, Newton HJ. 2020. Lysosomal degradation  
340 products induce *Coxiella burnetii* virulence. *Proc Natl Acad Sci USA* 117:6801–6810.
- 341 7. Sireci G, Badami GD, Di Liberto D, Blanda V, Grippi F, Di Paola L, Guercio A, de la Fuente  
342 J, Torina A. 2021. Recent Advances on the Innate Immune Response to *Coxiella burnetii*. *Front*  
343 *Cell Infect Microbiol* 11:754455.
- 344 8. Lührmann A, Roy CR. 2007. *Coxiella burnetii* inhibits activation of host cell apoptosis  
345 through a mechanism that involves preventing cytochrome c release from mitochondria. *Infect*  
346 *Immun* 75:5282–5289.
- 347 9. Mulye M, Samanta D, Winfree S, Heinzen RA, Gilk SD. 2017. Elevated cholesterol in the  
348 *Coxiella burnetii* intracellular niche is bacteriolytic. *MBio* 8:e02313-16.
- 349 10. Siadous FA, Cantet F, Van Schaik E, Burette M, Allombert J, Lakhani A, Bonaventure B,  
350 Goujon C, Samuel J, Bonazzi M, Martinez E. 2021. *Coxiella* effector protein CvpF subverts  
351 RAB26-dependent autophagy to promote vacuole biogenesis and virulence. *Autophagy* 17:706–  
352 722.
- 353 11. Larson CL, Beare PA, Howe D, Heinzen RA. 2013. *Coxiella burnetii* effector protein  
354 subverts clathrin-mediated vesicular trafficking for pathogen vacuole biogenesis. *Proc Natl Acad*  
355 *Sci USA* 110:E4770-9.
- 356 12. Voth DE. 2016. Subversion of macrophage autophagy and inflammatory pathways by  
357 *Coxiella burnetii*. *The Journal of Immunology* 196:131.1-131.1.



- 358 13. Voth DE, Howe D, Heinzen RA. 2007. *Coxiella burnetii* inhibits apoptosis in human THP-1  
359 cells and monkey primary alveolar macrophages. *Infect Immun* 75:4263–4271.
- 360 14. Macdonald LJ, Graham JG, Kurten RC, Voth DE. 2014. *Coxiella burnetii* exploits host  
361 cAMP-dependent protein kinase signalling to promote macrophage survival. *Cell Microbiol*  
362 16:146–159.
- 363 15. Vázquez CL, Colombo MI. 2010. *Coxiella burnetii* modulates Beclin 1 and Bcl-2, preventing  
364 host cell apoptosis to generate a persistent bacterial infection. *Cell Death Differ* 17:421–438.
- 365 16. Klingenbeck L, Eckart RA, Berens C, Lührmann A. 2013. The *Coxiella burnetii* type IV  
366 secretion system substrate CaeB inhibits intrinsic apoptosis at the mitochondrial level. *Cell*  
367 *Microbiol* 15:675–687.
- 368 17. Winchell CG, Graham JG, Kurten RC, Voth DE. 2014. *Coxiella burnetii* type IV secretion-  
369 dependent recruitment of macrophage autophagosomes. *Infect Immun* 82:2229–2238.
- 370 18. Gutierrez MG, Vázquez CL, Munafó DB, Zoppino FCM, Berón W, Rabinovitch M,  
371 Colombo MI. 2005. Autophagy induction favours the generation and maturation of the *Coxiella*-  
372 replicative vacuoles. *Cell Microbiol* 7:981–993.
- 373 19. Larson CL, Sandoz KM, Cockrell DC, Heinzen RA. 2019. Noncanonical inhibition of  
374 mTORC1 by *Coxiella burnetii* promotes replication within a phagolysosome-like vacuole. *mBio*  
375 10:e02816-18.
- 376 20. Bartel DP. 2018. Metazoan MicroRNAs. *Cell* 173:20–51.
- 377 21. Gebert LFR, MacRae IJ. 2019. Regulation of microRNA function in animals. *Nat Rev Mol*  
378 *Cell Biol* 20:21–37.
- 379 22. Vasudevan S, Tong Y, Steitz JA. 2007. Switching from repression to activation: microRNAs

- 380 can up-regulate translation. *Science* 318:1931–1934.
- 381 23. Agarwal V, Bell GW, Nam J-W, Bartel DP. 2015. Predicting effective microRNA target sites  
382 in mammalian mRNAs. *eLife* 4.
- 383 24. Wang W, Cai Y, Deng G, Yang Q, Tang P, Wu M, Yu Z, Yang F, Chen J, Werz O, Chen X.  
384 2020. Allelic-specific regulation of xCT expression increases susceptibility to tuberculosis by  
385 modulating microRNA-mRNA interactions. *mSphere* 5:e00263-20.
- 386 25. Huang T, Huang X, Yao M. 2018. miR-143 inhibits intracellular *Salmonella* growth by  
387 targeting ATP6V1A in macrophage cells in pig. *Res Vet Sci* 117:138–143.
- 388 26. Janssen HLA, Reesink HW, Lawitz EJ, Zeuzem S, Rodriguez-Torres M, Patel K, van der  
389 Meer AJ, Patick AK, Chen A, Zhou Y, Persson R, King BD, Kauppinen S, Levin AA, Hodges  
390 MR. 2013. Treatment of HCV infection by targeting microRNA. *N Engl J Med* 368:1685–1694.
- 391 27. Koriyama T, Yamakuchi M, Takenouchi K, Oyama Y, Takenaka H, Nagakura T, Masamoto  
392 I, Hashiguchi T. 2019. *Legionella pneumophila* infection-mediated regulation of RICTOR via  
393 miR-218 in U937 macrophage cells. *Biochem Biophys Res Commun* 508:608–613.
- 394 28. Liu N, Wang L, Sun C, Yang L, Sun W, Peng Q. 2016. MicroRNA-125b-5p suppresses  
395 *Brucella abortus* intracellular survival via control of A20 expression. *BMC Microbiol* 16:171.
- 396 29. Pierce JB, Simion V, Icli B, Pérez-Cremades D, Cheng HS, Feinberg MW. 2020.  
397 Computational analysis of targeting SARS-CoV-2, viral entry proteins ACE2 and TMPRSS2,  
398 and interferon genes by host microRNAs. *Genes (Basel)* 11:1354.
- 399 30. Schulte LN, Westermann AJ, Vogel J. 2013. Differential activation and functional  
400 specialization of miR-146 and miR-155 in innate immune sensing. *Nucleic Acids Res* 41:542–  
401 553.

- 402 31. Tamgue O, Gcanga L, Ozturk M, Whitehead L, Pillay S, Jacobs R, Roy S, Schmeier S,  
403 Davids M, Medvedeva YA, Dheda K, Suzuki H, Brombacher F, Guler R. 2019. Differential  
404 targeting of c-Maf, Bach-1, and Elmo-1 by microRNA-143 and microRNA-365 promotes the  
405 intracellular growth of *Mycobacterium tuberculosis* in alternatively IL-4/IL-13 activated  
406 macrophages. *Front Immunol* 10:421.
- 407 32. Bettencourt P, Marion S, Pires D, Santos LF, Lastrucci C, Carmo N, Blake J, Benes V,  
408 Griffiths G, Neyrolles O, Lugo-Villarino G, Anes E. 2013. Actin-binding protein regulation by  
409 microRNAs as a novel microbial strategy to modulate phagocytosis by host cells: the case of N-  
410 Wasp and miR-142-3p. *Front Cell Infect Microbiol* 3:19.
- 411 33. Kim JK, Yuk J-M, Kim SY, Kim TS, Jin HS, Yang C-S, Jo E-K. 2015. MicroRNA-125a  
412 inhibits autophagy activation and antimicrobial responses during Mycobacterial infection. *J*  
413 *Immunol* 194:5355–5365.
- 414 34. Millar JA, Valdés R, Kacharia FR, Landfear SM, Cambronne ED, Raghavan R. 2015.  
415 *Coxiella burnetii* and *Leishmania mexicana* residing within similar parasitophorous vacuoles  
416 elicit disparate host responses. *Front Microbiol* 6:794.
- 417 35. Coleman SA, Fischer ER, Howe D, Mead DJ, Heinzen RA. 2004. Temporal analysis of  
418 *Coxiella burnetii* morphological differentiation. *J Bacteriol* 186:7344–7352.
- 419 36. Krämer A, Green J, Pollard J, Tugendreich S. 2014. Causal analysis approaches in Ingenuity  
420 Pathway Analysis. *Bioinformatics* 30:523–530.
- 421 37. Das K, Garnica O, Dhandayuthapani S. 2016. Modulation of host miRNAs by intracellular  
422 bacterial pathogens. *Front Cell Infect Microbiol* 6:79.
- 423 38. Cordsmeier A, Wagner N, Lührmann A, Berens C. 2019. Defying death - how *Coxiella*

- 424 *burnetii* copes with intentional host cell suicide. Yale J Biol Med 92:619–628.
- 425 39. Voth DE, Heinzen RA. 2009. Sustained activation of Akt and Erk1/2 is required for *Coxiella*  
426 *burnetii* antiapoptotic activity. Infect Immun 77:205–213.
- 427 40. Schäfer W, Eckart RA, Schmid B, Cagköylü H, Hof K, Muller YA, Amin B, Lührmann A.  
428 2017. Nuclear trafficking of the anti-apoptotic *Coxiella burnetii* effector protein AnkG requires  
429 binding to p32 and Importin- $\alpha$ 1. Cell Microbiol 19.
- 430 41. Hatzimichael E, Dasoula A, Igglezou M, Katsenos A, Sainis I, Rigoutsos I, Briasoulis E.  
431 2015. Expression profiling of a panel of apoptosis related microRNAs in patients with acute  
432 myeloid leukemia. Blood 126:4971–4971.
- 433 42. He M, Wu N, Leong MC, Zhang W, Ye Z, Li R, Huang J, Zhang Z, Li L, Yao X, Zhou W,  
434 Liu N, Yang Z, Dong X, Li Y, Chen L, Li Q, Wang X, Wen J, Zhao X, Hu R. 2020. miR-145  
435 improves metabolic inflammatory disease through multiple pathways. J Mol Cell Biol 12:152–  
436 162.
- 437 43. Mambu J, Barilleau E, Fragnet-Trapp L, Le Vern Y, Olivier M, Sadrin G, Grépinet O, Taieb  
438 F, Velge P, Wiedemann A. 2020. Rck of *Salmonella* Typhimurium delays the host cell cycle to  
439 facilitate bacterial invasion. Front Cell Infect Microbiol 10:586934.
- 440 44. Takai T, Tsujino T, Yoshikawa Y, Inamoto T, Sugito N, Kuranaga Y, Heishima K, Soga T,  
441 Hayashi K, Miyata K, Kataoka K, Azuma H, Akao Y. 2019. Synthetic miR-143 exhibited an  
442 anti-cancer effect via the downregulation of K-RAS networks of renal cell cancer cells in vitro  
443 and in vivo. Mol Ther 27:1017–1027.
- 444 45. Liu L, Yu X, Guo X, Tian Z, Su M, Long Y, Huang C, Zhou F, Liu M, Wu X, Wang X.  
445 2012. miR-143 is downregulated in cervical cancer and promotes apoptosis and inhibits tumor

- 446 formation by targeting Bcl-2. Mol Med Report 5:753–760.
- 447 46. Liu M, Jia J, Wang X, Liu Y, Wang C, Fan R. 2018. Long non-coding RNA HOTAIR  
448 promotes cervical cancer progression through regulating BCL2 via targeting miR-143-3p.  
449 Cancer Biol Ther 19:391–399.
- 450 47. Pugazhenth S, Nesterova A, Sable C, Heidenreich KA, Boxer LM, Heasley LE, Reusch JE.  
451 2000. Akt/protein kinase B up-regulates Bcl-2 expression through cAMP-response element-  
452 binding protein. J Biol Chem 275:10761–10766.
- 453 48. Krakauer T. 2019. Inflammasomes, Autophagy, and Cell Death: The Trinity of Innate Host  
454 Defense against Intracellular Bacteria. Mediators Inflamm 2019:2471215.
- 455 49. Latomanski EA, Newton HJ. 2018. Interaction between autophagic vesicles and the *Coxiella*-  
456 containing vacuole requires CLTC (clathrin heavy chain). Autophagy 14:1710–1725.
- 457 50. Martinez E, Allombert J, Cantet F, Lakhani A, Yandrapalli N, Neyret A, Norville IH, Favard  
458 C, Muriaux D, Bonazzi M. 2016. *Coxiella burnetii* effector CvpB modulates phosphoinositide  
459 metabolism for optimal vacuole development. Proc Natl Acad Sci USA 113:E3260-9.
- 460 51. Manning BD, Toker A. 2017. AKT/PKB signaling: navigating the network. Cell 169:381–  
461 405.
- 462 52. Hein AL, Ouellette MM, Yan Y. 2014. Radiation-induced signaling pathways that promote  
463 cancer cell survival. Int J Oncol 45:1813–1819.
- 464 53. Eckart RA, Bisle S, Schulze-Luehrmann J, Wittmann I, Jantsch J, Schmid B, Berens C,  
465 Lührmann A. 2014. Antiapoptotic activity of *Coxiella burnetii* effector protein AnkG is  
466 controlled by p32-dependent trafficking. Infect Immun 82:2763–2771.
- 467 54. Chung CY-S, Shin HR, Berdan CA, Ford B, Ward CC, Olzmann JA, Zoncu R, Nomura DK.

- 468 2019. Covalent targeting of the vacuolar H<sup>+</sup>-ATPase activates autophagy via mTORC1  
469 inhibition. *Nat Chem Biol* 15:776–785.
- 470 55. Mukhopadhyay S, Biancur DE, Parker SJ, Yamamoto K, Banh RS, Paulo JA, Mancias JD,  
471 Kimmelman AC. 2021. Autophagy is required for proper cysteine homeostasis in pancreatic  
472 cancer through regulation of SLC7A11. *Proc Natl Acad Sci USA* 118.
- 473 56. Mauvezin C, Neufeld TP. 2015. Bafilomycin A1 disrupts autophagic flux by inhibiting both  
474 V-ATPase-dependent acidification and Ca-P60A/SERCA-dependent autophagosome-lysosome  
475 fusion. *Autophagy* 11:1437–1438.
- 476 57. Lin X-T, Zheng X-B, Fan D-J, Yao Q-Q, Hu J-C, Lian L, Wu X-J, Lan P, He X-S. 2018.  
477 MicroRNA-143 targets ATG2B to inhibit autophagy and increase inflammatory responses in  
478 Crohn’s disease. *Inflamm Bowel Dis* 24:781–791.
- 479 58. Romano PS, Gutierrez MG, Berón W, Rabinovitch M, Colombo MI. 2007. The autophagic  
480 pathway is actively modulated by phase II *Coxiella burnetii* to efficiently replicate in the host  
481 cell. *Cell Microbiol* 9:891–909.
- 482 59. Dragan AL, Kurten RC, Voth DE. 2019. Characterization of early stages of human alveolar  
483 infection by the Q fever agent *Coxiella burnetii*. *Infect Immun* 87:e00028-19.
- 484 60. Ke Y, Chen X, Su Y, Chen C, Lei S, Xia L, Wei D, Zhang H, Dong C, Liu X, Yin F. 2021.  
485 Low expression of SLC7A11 confers drug resistance and worse survival in ovarian cancer via  
486 inhibition of cell autophagy as a competing endogenous RNA. *Front Oncol* 11:744940.
- 487 61. Sandoz KM, Beare PA, Cockrell DC, Heinzen RA. 2016. Complementation of arginine  
488 auxotrophy for genetic transformation of *Coxiella burnetii* by use of a defined axenic medium.  
489 *Appl Environ Microbiol* 82:3042–3051.

- 490 62. Zhang W, Chen P, Zong H, Ding Y, Yan R. 2020. miR-143-3p targets ATG2B to inhibit  
491 autophagy and promote endothelial progenitor cells tube formation in deep vein thrombosis.  
492 Tissue Cell. 67:101453.
- 493 63. Omsland A, Cockrell DC, Howe D, Fischer ER, Virtaneva K, Sturdevant DE, Porcella SF,  
494 Heinzen RA. 2009. Host cell-free growth of the Q fever bacterium *Coxiella burnetii*. Proc Natl  
495 Acad Sci USA 106:4430–4434.
- 496 64. Martinez E, Cantet F, Bonazzi M. 2015. Generation and multi-phenotypic high-content  
497 screening of *Coxiella burnetii* transposon mutants. J Vis Exp e52851.
- 498 65. Moses AS, Millar JA, Bonazzi M, Beare PA, Raghavan R. 2017. Horizontally acquired  
499 biosynthesis genes boost *Coxiella burnetii*'s physiology. Front Cell Infect Microbiol 7:174.
- 500 66. Graham JG, Winchell CG, Kurten RC, Voth DE. 2016. Development of an ex vivo tissue  
501 platform to study the human lung response to *Coxiella burnetii*. Infect Immun 84:1438–1445.
- 502 67. Ganesan S, Roy CR. 2019. Host cell depletion of tryptophan by IFN $\gamma$ -induced Indoleamine  
503 2,3-dioxygenase 1 (IDO1) inhibits lysosomal replication of *Coxiella burnetii*. PLoS Pathog  
504 15:e1007955.
- 505 68. Sanchez SE, Vallejo-Esquerria E, Omsland A. 2018. Use of axenic culture tools to study  
506 *Coxiella burnetii*. Curr Protoc Microbiol 50:e52.
- 507 69. Hayek I, Fischer F, Schulze-Luehrmann J, Dettmer K, Sobotta K, Schatz V, Kohl L, Boden  
508 K, Lang R, Oefner PJ, Wirtz S, Jantsch J, Lührmann A. 2019. Limitation of TCA cycle  
509 intermediates represents an oxygen-independent nutritional antibacterial Eeffector mechanism of  
510 macrophages. Cell Rep 26:3502-3510.e6.
- 511 70. Kozomara A, Birgaoanu M, Griffiths-Jones S. 2019. miRBase: from microRNA sequences to

- 512 function. *Nucleic Acids Res* 47:D155–D162.
- 513 71. Tweedie S, Braschi B, Gray K, Jones TEM, Seal RL, Yates B, Bruford EA. 2021.
- 514 Genenames.org: the HGNC and VGNC resources in 2021. *Nucleic Acids Res* 49:D939–D946.
- 515 72. Love MI, Huber W, Anders S. 2014. Moderated estimation of fold change and dispersion for
- 516 RNA-seq data with DESeq2. *Genome Biol* 15:550.
- 517 73. Livak KJ, Schmittgen TD. 2001. Analysis of relative gene expression data using real-time
- 518 quantitative PCR and the  $2^{-(\Delta\Delta C(T))}$  Method. *Methods* 25:402–408.
- 519 74. Sachan M, Srivastava A, Ranjan R, Gupta A, Pandya S, Misra A. 2016. Opportunities and
- 520 challenges for host-directed therapies in tuberculosis. *Curr Pharm Des* 22:2599–2604.
- 521 75. Zhou J, Tan S-H, Nicolas V, Bauvy C, Yang N-D, Zhang J, Xue Y, Codogno P, Shen H-M.
- 522 2013. Activation of lysosomal function in the course of autophagy via mTORC1 suppression and
- 523 autophagosome-lysosome fusion. *Cell Res* 23:508–523.
- 524 76. Rontogianni S, Iskit S, van Doorn S, Peeper DS, Altelaar M. 2020. Combined EGFR and
- 525 ROCK inhibition in triple-negative breast cancer leads to cell death via impaired autophagic flux.
- 526 *Mol Cell Proteomics* 19:261–277.
- 527 77. Stankov M, Panayotova-Dimitrova D, Leverkus M, Klusmann J-H, Behrens G. 2014. Flow
- 528 cytometric analysis of autophagic activity with Cyto-ID staining in primary cells. *Bio Protoc* 4.
- 529 78. Plubell DL, Wilmarth PA, Zhao Y, Fenton AM, Minnier J, Reddy AP, Klimek J, Yang X,
- 530 David LL, Pamir N. 2017. Extended multiplexing of tandem mass tags (TMT) labeling reveals
- 531 age and high fat diet specific proteome changes in mouse epididymal adipose tissue. *Mol Cell*
- 532 *Proteomics* 16:873–890.
- 533



534 **FIGURE LEGENDS**

535 **Figure 1. Host pathways potentially regulated by miRNAs during *C. burnetii* infection.** Top  
536 20 miRNA-targeted pathways significantly impacted in THP-1 macrophages infected with NMII.  
537 Orange bars show pathways that are putatively activated ( $z\text{-score} \geq 1.5$ ), and blue bars  
538 correspond to pathways that were predicted to be inhibited ( $z\text{-score} \leq -1.5$ ) using ingenuity  
539 pathway analysis (IPA). See full list in **Table S3**.

540

541 **Figure 2. miR-143-3p expression is down-regulated in *C. burnetii*-infected macrophages. (A)**  
542 Expression of miR-143-3p measured via RNA-seq ( $n = 3$ ; 72 hpi) in NMII-infected THP-1 cells  
543 compared to uninfected cells. **(B)** Primary human alveolar macrophages (hAMs) infected with  
544 NMI or NMII or uninfected controls were analyzed for miR-143-3p expression using qRT-PCR at  
545 72 hpi. Statistical significance in (A) was calculated using two-tailed paired Student's t-test  
546 followed by Welch's correction, and in (B) using one-way ANOVA followed by Tukey's multiple  
547 comparison test ( $n = 3$ ).

548

549 **Figure 3. Intracellular growth of *C. burnetii* is inhibited in the presence of excessive miR-**  
550 **143-3p.** Quantification of intracellular *C. burnetii* at 48 hpi using qPCR **(A)** or CFU assay **(B)** in  
551 miR-143-3p-transfected HeLa cells compared to untransfected cells (Mock) and cells transfected  
552 with non-specific control miRNA (miR-control). Statistical significance was determined using  
553 one-way ANOVA followed by Tukey's multiple comparison test (ns: non-significant,  $n = 3$ ).

554

555 **Figure 4. miR-143-3p transfection promotes early apoptosis.** Percentage of early **(A)** or late  
556 **(B)** apoptotic HeLa cells transfected with either miR-143-3p or a non-specific control miRNA

557 (miR-control). Early apoptosis (Annexin V-PE positive and eFluor780 negative) and late  
558 apoptosis/necrosis (Annexin V-PE positive and eFluor780 positive) were quantified by flow  
559 cytometry. Statistical significance was determined using two-tailed paired Student's t-test  
560 followed by Welch's correction (n = 3).

561

562 **Figure 5. Increased miR-143-3p expression leads to reduced expression of apoptosis-related**

563 **genes.** (A) Expression (fold change) of *akt1* and *bcl2* genes in HeLa cells transfected with miR-  
564 143-3p compared to cells transfected with control miRNA (miR-control) measured using qRT-  
565 PCR. Statistical significance was determined using two-tailed paired t-test followed by Welch's  
566 correction (n = 3). (B) Fold change in phosphorylated Akt (pSer473) and Bcl-2 (pSer70) proteins  
567 in HeLa cells transfected with miR-143-3p compared to cells transfected with miR-control  
568 measured using a multiplex immunoassay. Activated proteins were measured as median  
569 fluorescence intensity and statistical significance was determined using two-tailed paired  
570 Student's t-test followed by Welch's correction (n = 3).

571

572 **Figure 6. miR-143-3p inhibits autophagic flux.** Y-axis shows relative autophagy flux reported

573 as average brightness of CYTO-ID green (a cationic tracer that selectively labels autophagic  
574 compartments) per cell in miR-143-3p-transfected HeLa cells compared to cells transfected with  
575 control miRNA (miR-control). Average CYTO-ID green brightness values were calculated from  
576 three sets of at least 200 cells per well and statistical significance was determined using two-  
577 tailed paired Student's t-test followed by Welch's correction (n = 3).

578

579 **Figure 7. Transfection of HeLa cells with miR-143-3p decreased *atp6v1a*/VATA and**  
580 ***slc7a11*/xCT expression. (A) *atp6v1a* and *slc7a11* gene expression (fold change) in HeLa cells**  
581 **transfected with miR-143-3p compared to cells transfected with control miRNA (miR-control)**  
582 **measured using qRT-PCR. (B) VATA (encoded by *atp6v1a*) and xCT (encoded by *slc7a11*)**  
583 **proteins (fold change) in HeLa cells transfected with miR-143-3p compared to cells transfected**  
584 **with miR-control measured using quantitative mass-spectrometry. Statistical significance was**  
585 **determined using two-tailed paired Student's t-test followed by Welch's correction (n = 3).**  
586  
587  
588

589 **Table 1.** Number of differentially-expressed miRNAs and mRNAs in *C. burnetii*-infected THP-1  
590 macrophages.

|         | miRNA <sup>a</sup> |      |    | mRNA <sup>a</sup>  |       |       |
|---------|--------------------|------|----|--------------------|-------|-------|
| Time    | Total <sup>b</sup> | Down | Up | Total <sup>b</sup> | Down  | Up    |
| 8 hpi   | 25                 | 12   | 13 | 454                | 220   | 234   |
| 24 hpi  | 25                 | 16   | 9  | 1,160              | 665   | 495   |
| 48 hpi  | 35                 | 23   | 12 | 1,742              | 445   | 1,297 |
| 72 hpi  | 60                 | 43   | 17 | 6,525              | 3,236 | 3,289 |
| 120 hpi | 34                 | 18   | 16 | 211                | 80    | 131   |

591

592 <sup>a</sup>The current build of the human genome (GRCh38) has 2,654 mature miRNA sequences and  
593 19,231 protein-coding genes.

594 <sup>b</sup>Differential expression ( $\log_2$  fold change  $\geq 0.75$ ;  $P_{adj} \leq 0.05$ , Wald test) at respective hours  
595 post-infection (hpi) was calculated using DESeq2 (72).

596

597

598

599

600

601 **Table 2.** Differentially-expressed ( $p \leq 0.05$ ,  $n = 3$ ) miRNAs in NMII-infected THP-1 cells  
602 compared to uninfected controls.

603

| <b>miRNA</b>    | <b>Fold Change</b> | <b>p-value</b> |
|-----------------|--------------------|----------------|
| hsa-miR-708-5p  | 0.6225             | 0.037471       |
| hsa-miR-145-5p  | 0.6312             | 0.006722       |
| hsa-miR-143-3p  | 0.6535             | 0.007199       |
| hsa-miR-106b-5p | 0.7386             | 0.032799       |
| hsa-miR-181d-5p | 0.7611             | 0.028265       |
| hsa-miR-16-5p   | 0.8026             | 0.024211       |
| hsa-miR-222-3p  | 0.8804             | 0.014724       |
| hsa-miR-365b-3p | 1.1015             | 0.016939       |
| hsa-miR-218-5p  | 1.5832             | 0.013546       |
| hsa-miR-125a-5p | 1.5868             | 0.010438       |
| hsa-miR-192-5p  | 1.7689             | 0.03232        |
| hsa-miR-146a-5p | 5.9635             | 0.000006       |

604

605

606

607 **SUPPLEMENTARY FIGURE**

608 **Figure S1. PI3K/Akt signaling network.** Activation of PI3K by pro-survival stimuli leads to  
609 phosphorylation/activation of Akt. Akt in turn activates anti-apoptotic proteins and pro-survival  
610 transcription factor NF- $\kappa$ B, which leads to the induction of pro-survival proteins Bcl-2 and Bcl-  
611 xL, and activation of XIAP. Bcl-2 prevents the release of cytochrome c from mitochondria,  
612 thereby preventing apoptosis. Inhibition of *akt1* and *bcl2* expression by miR-143-3p (44–47),  
613 shown in red, could reverse this process to promote apoptosis.

614

615 **SUPPLEMENTARY TABLES**

616 **Table S1.** Differentially expressed miRNAs and mRNAs in NMII-infected THP-1 cells.

617 **Table S2.** Inverse expression pairs of differentially expressed miRNAs and target mRNAs.

618 **Table S3.** List of pathways enriched for miRNA-regulated genes.

619 **Table S4.** List of downregulated proteins in miR-143-3p-transfected HeLa cells identified using  
620 mass spectrometry.

621 **Table S5.** List of primers used in this study.

622

623

624

**Figure 1**

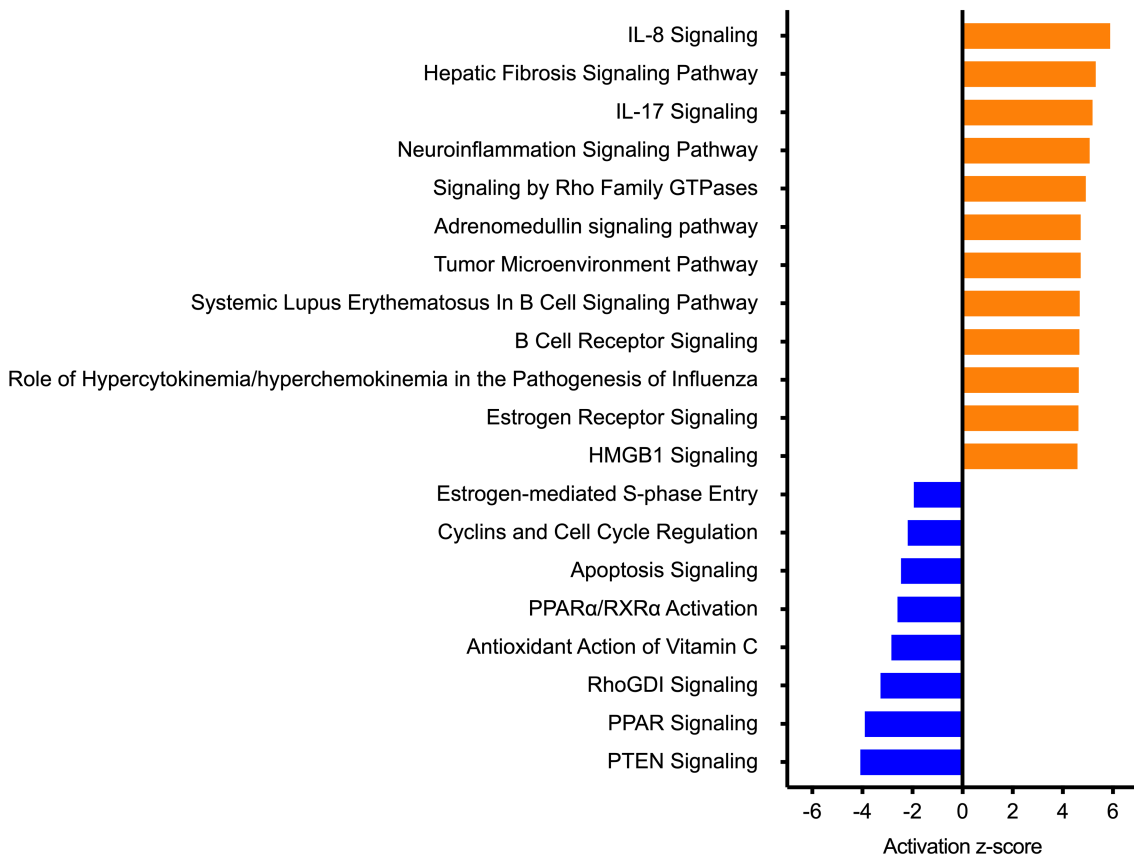

**Figure 2**

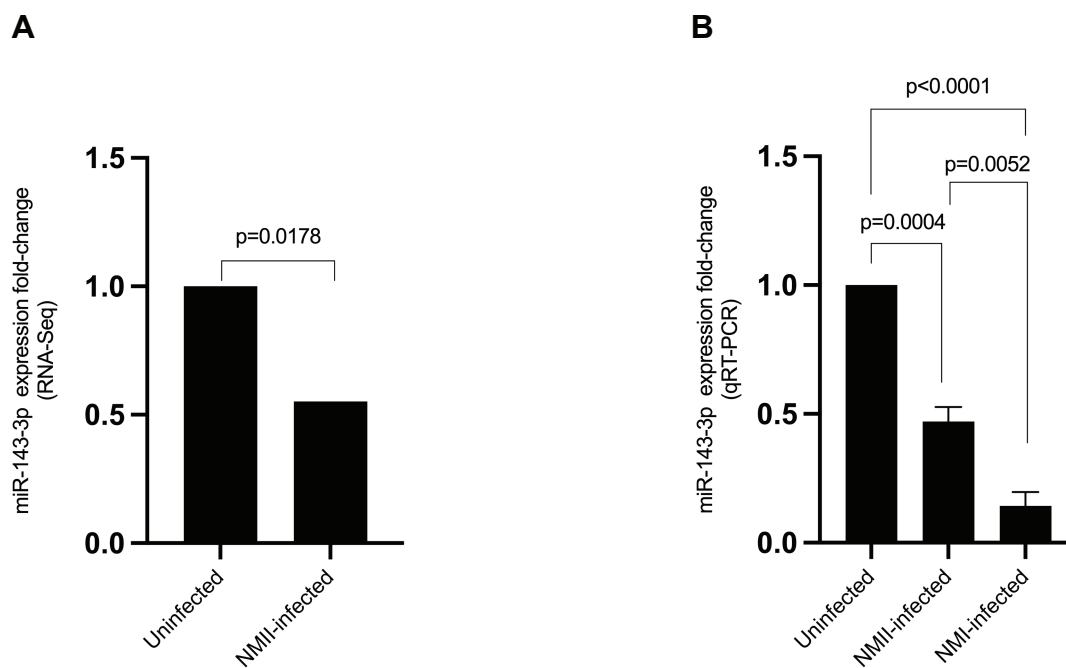



**Figure 3**

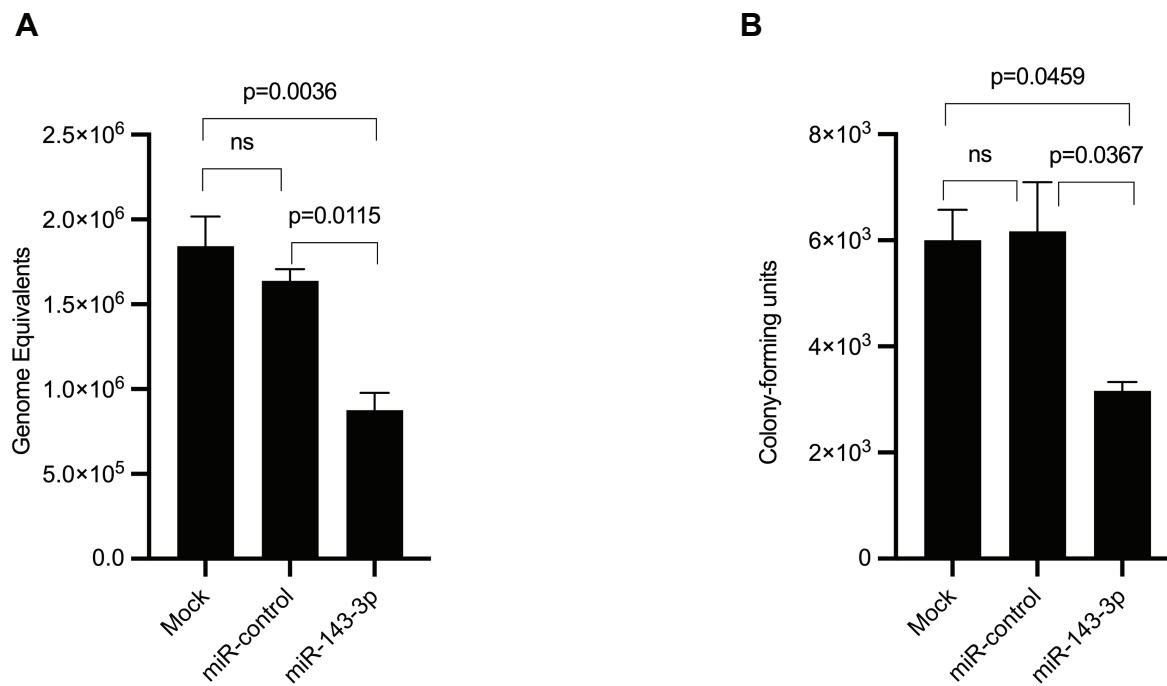

**Figure 4**

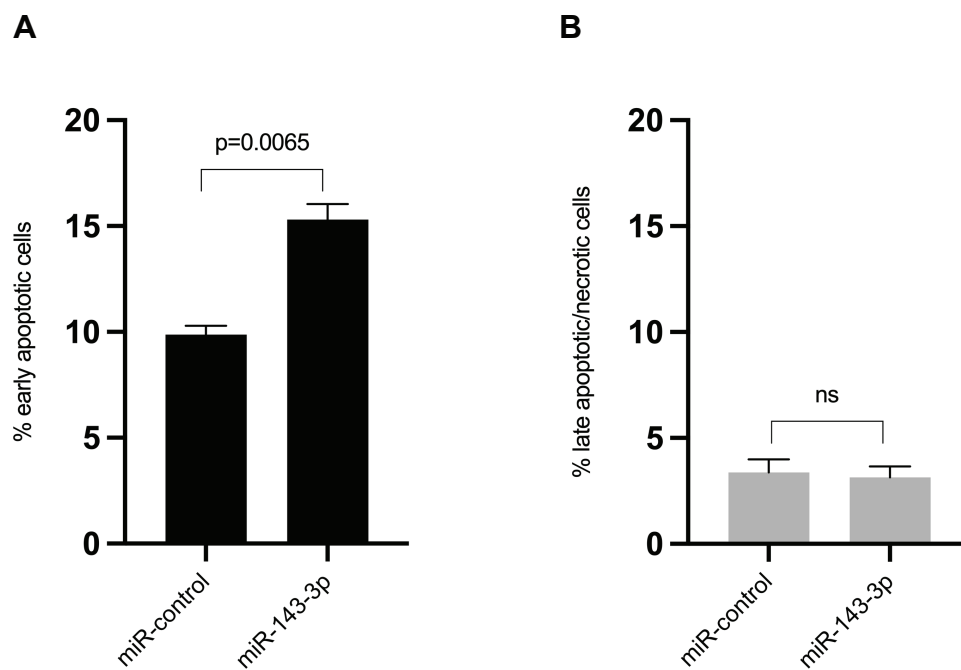

**Figure 5**

**A**

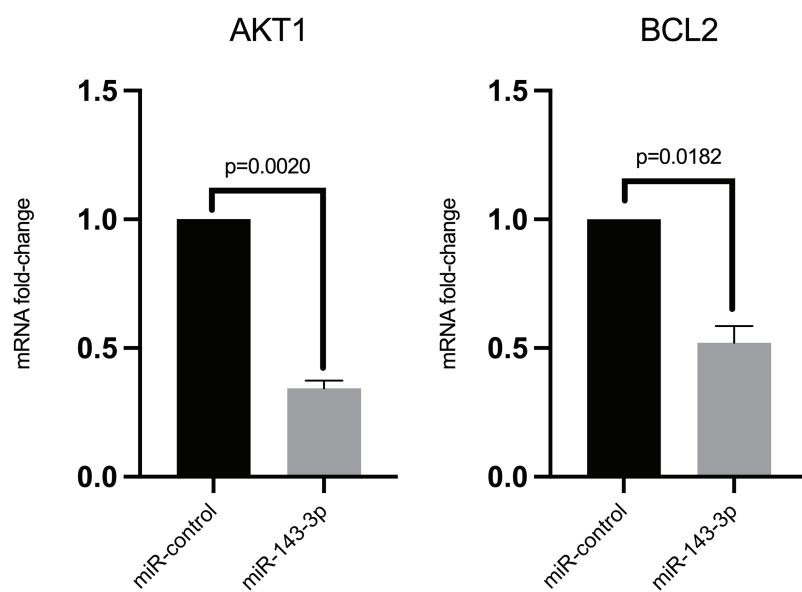

**B**

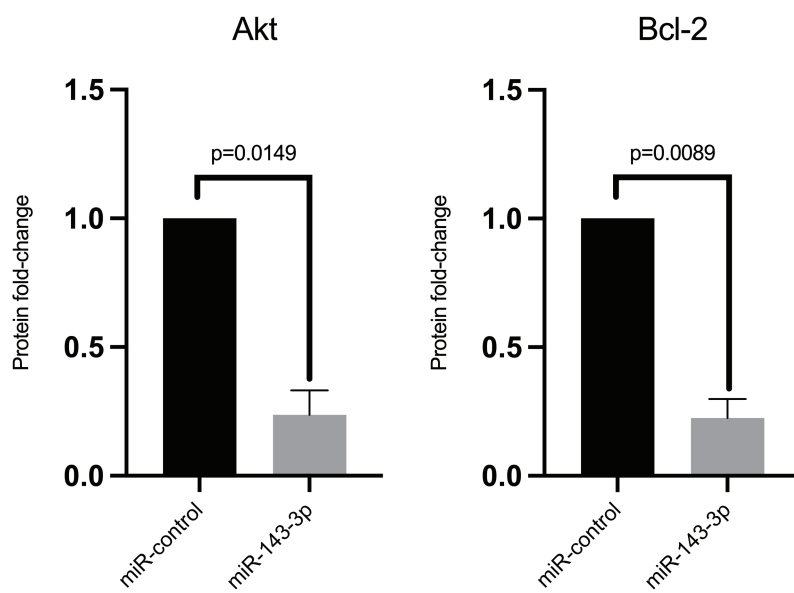

**Figure 6**

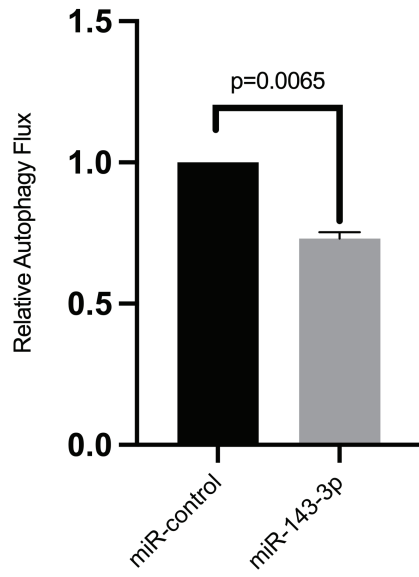

**Figure 7**

**A**

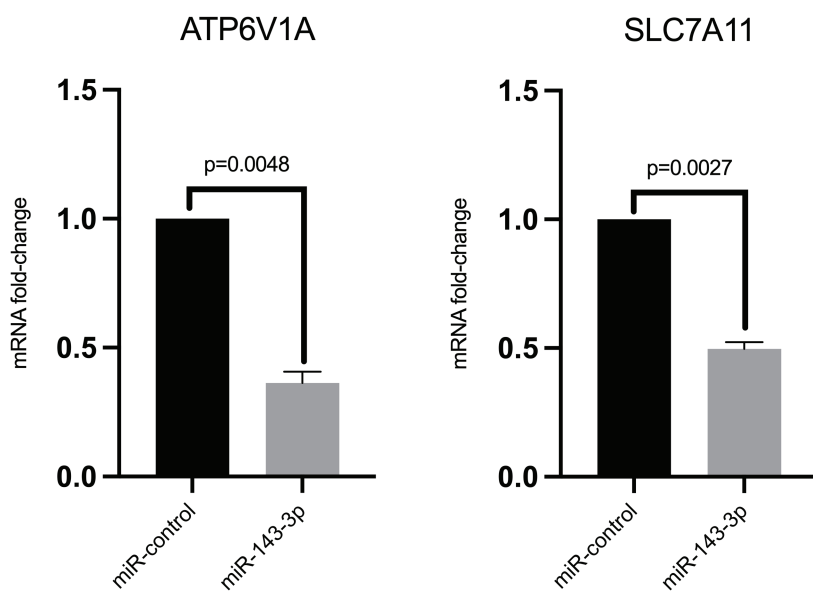

**B**

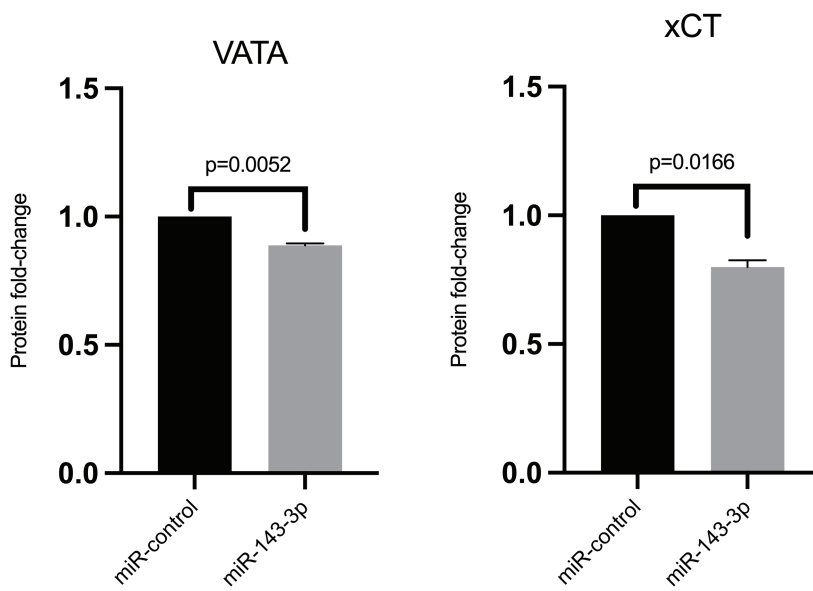

Source: https://www.biorxiv.org/content/10.1101/2022.05.11.491587v1.full.pdf
